# Supplementary material for: Strain-driven phase transition and spin polarization of Re-doped transition-metal dichalcogenides
Source: Royal Society of Chemistry journal article supplement (doi:10.1039/d1cp00640a), 2021-01-01
Supplement: d1cp00640a1.pdf [file d1cp00640a1.pdf]

**Electronic Supporting Information:**  
**Strain-driven Phase Transition and Spin Polarization of Re-doped Transition-Metal  
Dichalcogenides**

Rui-Ning Wang,<sup>1,\*</sup> Chen-Dong Jin,<sup>1</sup> Hu Zhang,<sup>1</sup> Ru-Qian Lian,<sup>1</sup> Xing-Qiang Shi,<sup>1</sup> and Jiang-Long Wang<sup>1,†</sup>

<sup>1</sup>*Key Laboratory of Optic-Electronic Information and Materials of Hebei Province,  
National-Local Joint Engineering Laboratory of New Energy Photoelectric Devices,  
Key Laboratory of High-precision Computation and Application of Quantum Field Theory of Hebei Province,  
College of Physics Science and Technology, Hebei University, Baoding, 071002, P. R. China*

(Dated: March 8, 2021)

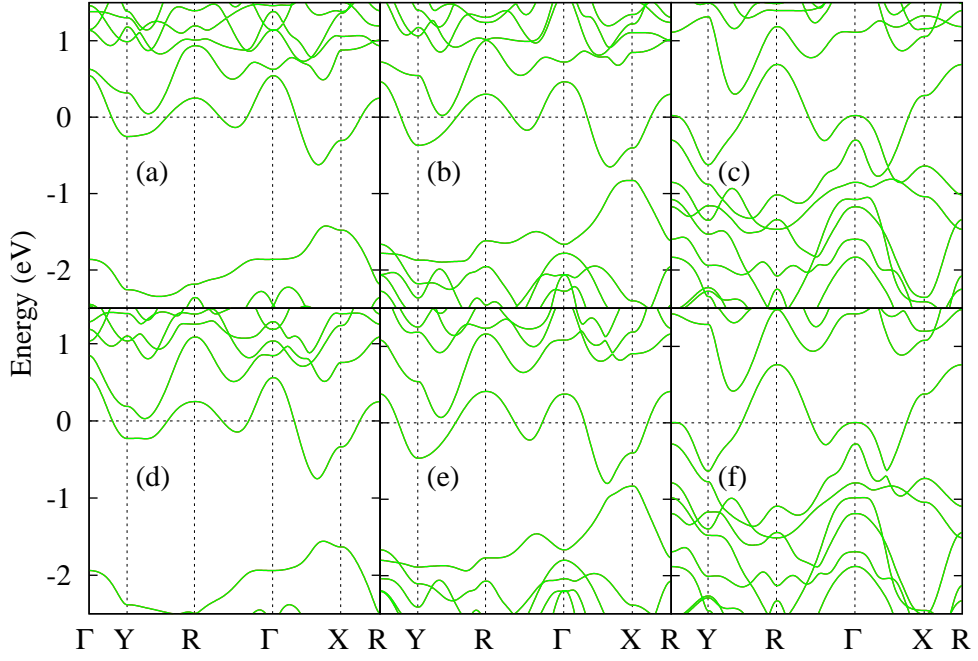

FIG. S1: (Color online). Calculated band structures of  $1H\text{-Re}_{0.5}\text{M}_{0.5}\text{X}_2$  monolayers without strain ((a)  $1H\text{-Re}_{0.5}\text{Mo}_{0.5}\text{S}_2$ , (b)  $1H\text{-Re}_{0.5}\text{Mo}_{0.5}\text{Se}_2$ , (c)  $1H\text{-Re}_{0.5}\text{Mo}_{0.5}\text{Te}_2$ , (d)  $1H\text{-Re}_{0.5}\text{W}_{0.5}\text{S}_2$ , (e)  $1H\text{-Re}_{0.5}\text{W}_{0.5}\text{Se}_2$ , (f)  $1H\text{-Re}_{0.5}\text{W}_{0.5}\text{Te}_2$ ). The Fermi level is set to zero.

Under strain-free conditions, all of  $1H\text{-Re}_{0.5}\text{M}_{0.5}\text{X}_2$  ( $\text{M} = \text{Mo}, \text{W}$  and  $\text{X} = \text{S}, \text{Se}, \text{Te}$ ) monolayers show n-type character, but the spin-up and spin-down bands are symmetric. Thus, all of them are non-magnetic.

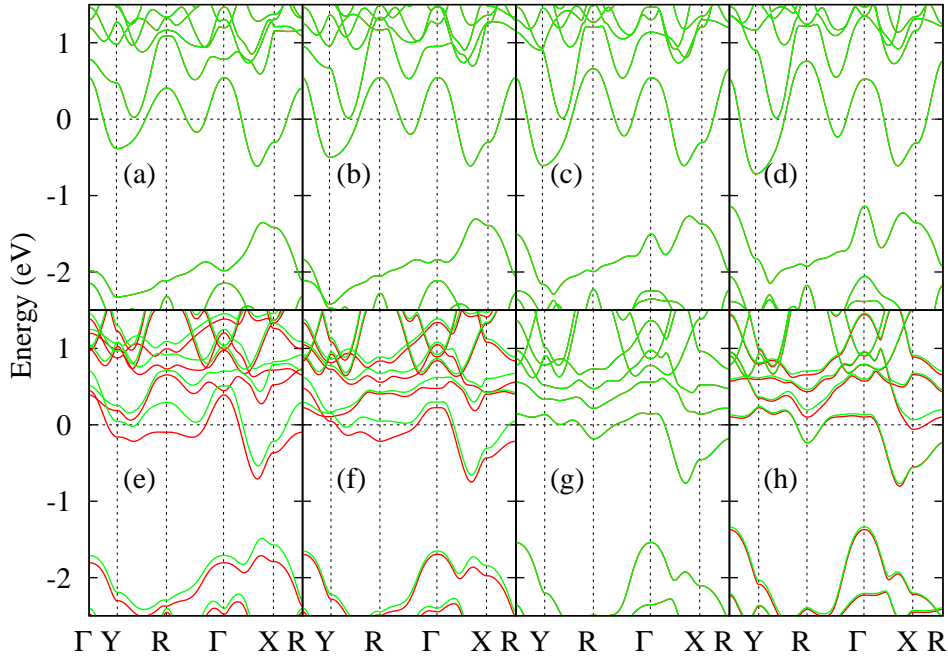

FIG. S2: (Color online). Calculated band structures of  $1H\text{-Re}_{0.5}\text{Mo}_{0.5}\text{S}_2$  monolayer as a function of lattice constant  $\vec{a}$  ((a) 3.078 Å, (b) 3.013 Å, (c) 2.950 Å, (d) 2.886 Å, (e) 3.206 Å, (f) 3.270 Å, (g) 3.335 Å, (h) 3.399 Å.) with a fixed  $\vec{b}=5.553$  Å. The fermi level is set to zero. Red: Spin-up bands; Green: Spin-down bands.

For  $1H\text{-Re}_{0.5}\text{Mo}_{0.5}\text{S}_2$  monolayers, their band structures as a function of lattice constant  $\vec{a}$  with a fixed  $\vec{b}=5.553$  Å are shown in Fig. S2. All conduction bands cross down the Fermi level, showing n-type characters. Furthermore, the spin-down and spin-up bands are always symmetric under uniaxial compressive strains ( $\vec{a} < 3.142$  Å, (a-d)). That is, a uniaxial compressive strain does not induce magnetism. When the tensile strain ( $\vec{a} = 3.206$  Å) is applied, the spin splitting between the spin-up and spin-down bands starts to appear. When the lattice constant  $\vec{a}$  reaches to 3.335 Å, the splitting is sharply reduced and the magnetism will disappear.

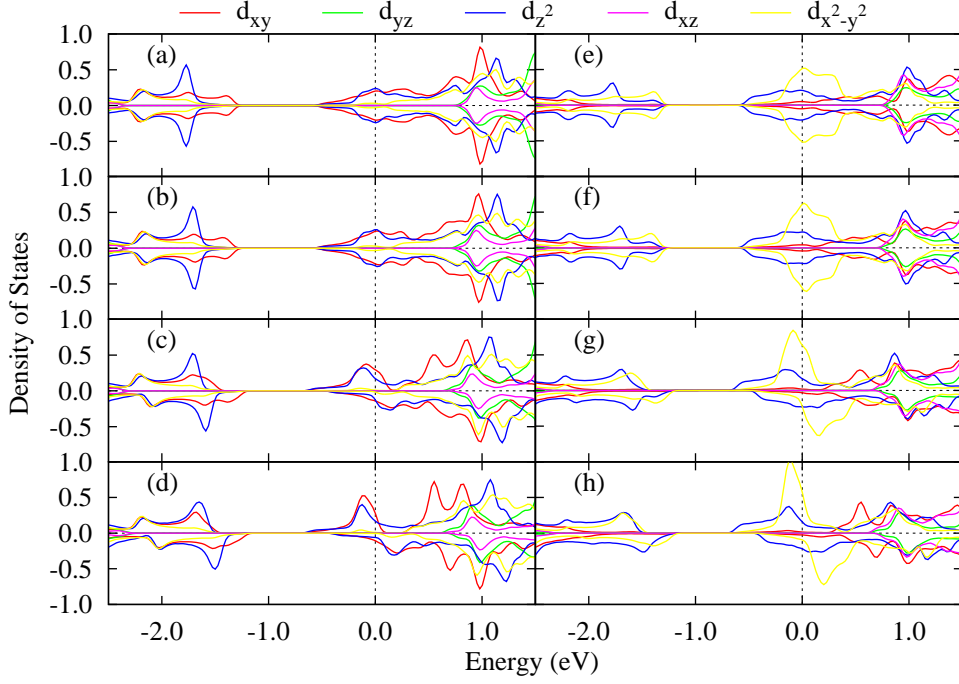

FIG. S3: (Color online). Calculated spin-polarized orbital projected density of states (DOS, (a-d) Mo and (e-h) Re) as a function of lattice constant  $\vec{b}$  ((a,e)  $\vec{b}=5.553$  Å, (b,f)  $\vec{b}=5.609$  Å, (c,g)  $\vec{b}=5.665$  Å, (d,h)  $\vec{b}=5.720$  Å) for  $1H\text{-Re}_{0.5}\text{Mo}_{0.5}\text{S}_2$  with a fixed  $\vec{a} = 3.142$  Å. Positive and negative values represent the spin-up and spin-down DOS, respectively. The Fermi level is taken as zero.

With a fixed  $\vec{a} = 3.142$  Å, as a tensile uniaxial strain is applied to  $1H\text{-Re}_{0.5}\text{Mo}_{0.5}\text{S}_2$  along the  $\vec{b}$  direction, the density of states around the Fermi level become narrower and narrower with increasing the tensile strain. As shown in Fig. S3(c, g), when  $\vec{b}=5.665$  Å, the density of states begin to split, further leading to the magnetism appearing.

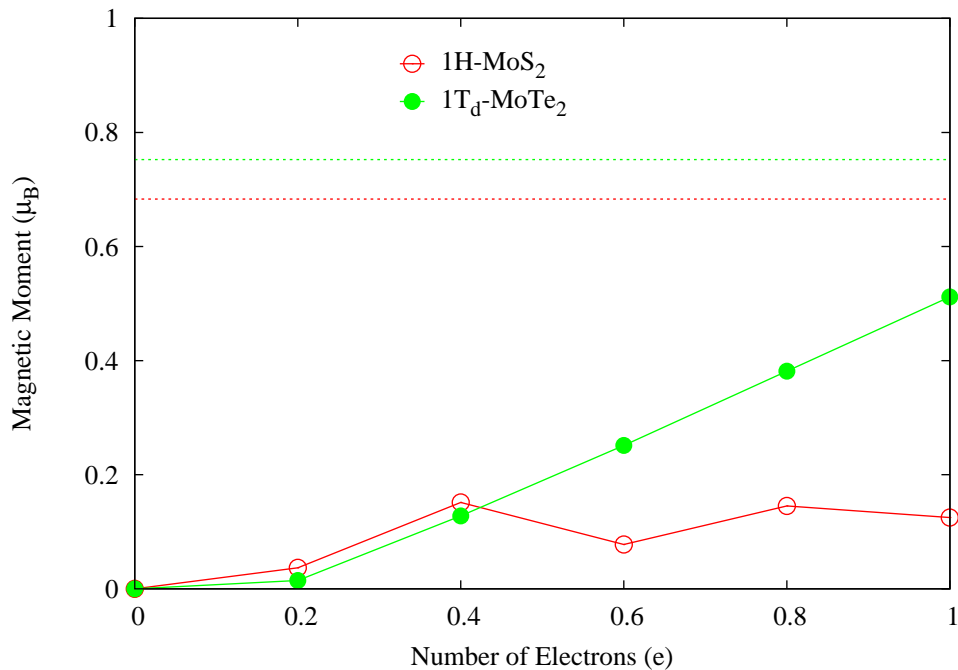

FIG. S4: (Color online). Calculated magnetic moments ( $\mu_B$ ) as a function of the additional virtual electrons for  $1H$ -MoS<sub>2</sub> with  $\vec{a} = 3.142 \text{ \AA}$  and  $\vec{b} = 5.887 \text{ \AA}$  and  $1T_d$ -MoTe<sub>2</sub> with  $\vec{a} = 3.670 \text{ \AA}$  and  $\vec{b} = 6.357 \text{ \AA}$ . Their corresponding magnetic moments for  $1H$ -Re<sub>0.5</sub>Mo<sub>0.5</sub>S<sub>2</sub> and  $1T_d$ -Re<sub>0.5</sub>Mo<sub>0.5</sub>Te<sub>2</sub> are indicated by dashed lines as the reference values.

Because Re doping will introduce one additional electron to MX<sub>2</sub> monolayers, we use the virtual electron approximation method to simulate the magnetic properties by Re doping. For monolayer  $1H$ -MoS<sub>2</sub> with  $\vec{a} = 3.142 \text{ \AA}$  and  $\vec{b} = 5.887 \text{ \AA}$ , Re doping induce  $0.684 \mu_B$  while one additional electron only induces the magnetic moment ( $0.125 \mu_B$ ). For monolayer  $1T_d$ -MoTe<sub>2</sub> with  $\vec{a} = 3.670 \text{ \AA}$  and  $\vec{b} = 6.357 \text{ \AA}$ , the magnetic moments are  $0.753 \mu_B$  and  $0.512 \mu_B$  for Re doping and one virtual electron doping, respectively.

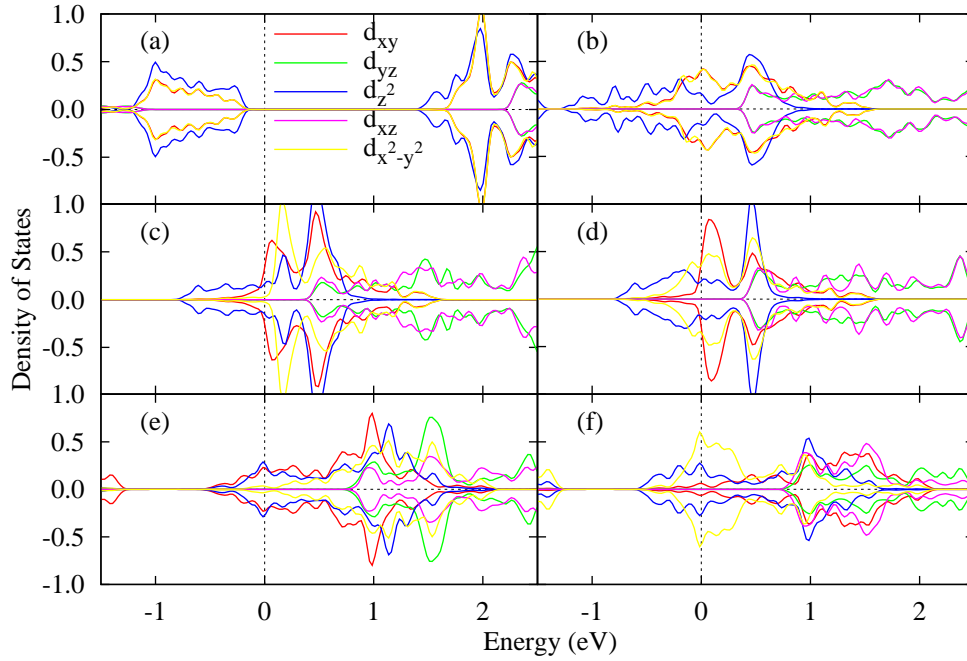

FIG. S5: (Color online). Calculated spin-polarized atomic orbital projected density of states (DOS) (a)  $1H$ - $\text{MoS}_2$ , (b)  $1H$ - $\text{ReS}_2$ , (c,d)  $1H$ - $\text{Re}_{0.5}\text{Mo}_{0.5}\text{S}_2$  in a perfect hexagonal lattice, and (e,f) fully optimized  $1H$ - $\text{Re}_{0.5}\text{Mo}_{0.5}\text{S}_2$  without strain. (a, c, e) and (b, d, f) panels indicate the Mo and Re atoms, respectively. Positive and negative values represent the spin-up and spin-down DOS, respectively. The Fermi level is taken as zero.

Fig. S5(a) gives the Mo atomic orbital projected density of states in pure  $1H$ - $\text{MoS}_2$ , showing one  $d_{z^2}$  orbit and two degenerate  $d_{xy}/d_{x^2-y^2}$  orbits around the Fermi level. Fig. S5(b) gives the Re atomic orbital projected density of states in pure  $1H$ - $\text{ReS}_2$ , showing one  $d_{z^2}$  orbit and two degenerate  $d_{xy}/d_{x^2-y^2}$  orbits through the Fermi level because one additional electron is doped. Fig. S5(c, d) give the Mo and Re atomic orbital projected density of states in  $1H$ - $\text{Re}_{0.5}\text{Mo}_{0.5}\text{S}_2$  with a perfect hexagonal lattice (Mo at (0,0) site and Re at (0.5, 0.5) site), respectively. However, the original degenerate  $d_{xy}/d_{x^2-y^2}$  orbits are split. For Mo atom, the  $d_{xy}$  orbit is closer to the Fermi level while the  $d_{x^2-y^2}$  orbit of Re atom through the Fermi level. After full-optimization (Fig. S5(e, f)), the hexagonal lattice is broken, further leading to the  $d_{z^2}$  and  $d_{xy}$  orbits of Mo atom and the  $d_{z^2}$  and  $d_{x^2-y^2}$  orbits of Re atom through the Fermi level.

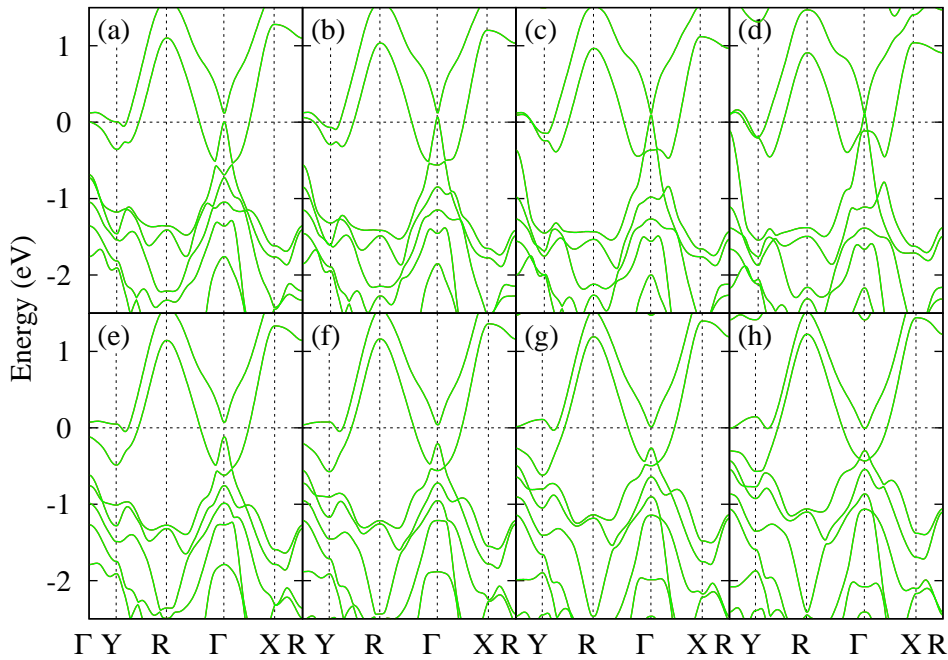

FIG. S6: (Color online). Calculated band structures of  $1T_d\text{-Re}_{0.5}\text{Mo}_{0.5}\text{S}_2$  monolayers as a function of lattice constant  $\vec{b}$  ((a) 5.609 Å, (b) 5.498 Å, (c) 5.387 Å, (d) 5.276 Å, (e) 5.776 Å, (f) 5.887 Å, (g) 5.998 Å, (h) 6.109 Å) with a fixed  $\vec{a} = 3.142$  Å. The fermi level is set to zero. Red: Spin-up bands; Green: Spin-down bands.

For  $1T_d\text{-Re}_{0.5}\text{Mo}_{0.5}\text{S}_2$  monolayers, their band structures as a function of lattice constant  $\vec{b}$  with a fixed  $\vec{a}=3.142$  Å are shown in Fig. S6. All conduction bands cross down the Fermi level, showing n-type characters. Furthermore, the spin-down and spin-up bands are always symmetric. That is, a uniaxial compressive strain along the  $\vec{b}$  direction does not induce magnetism.

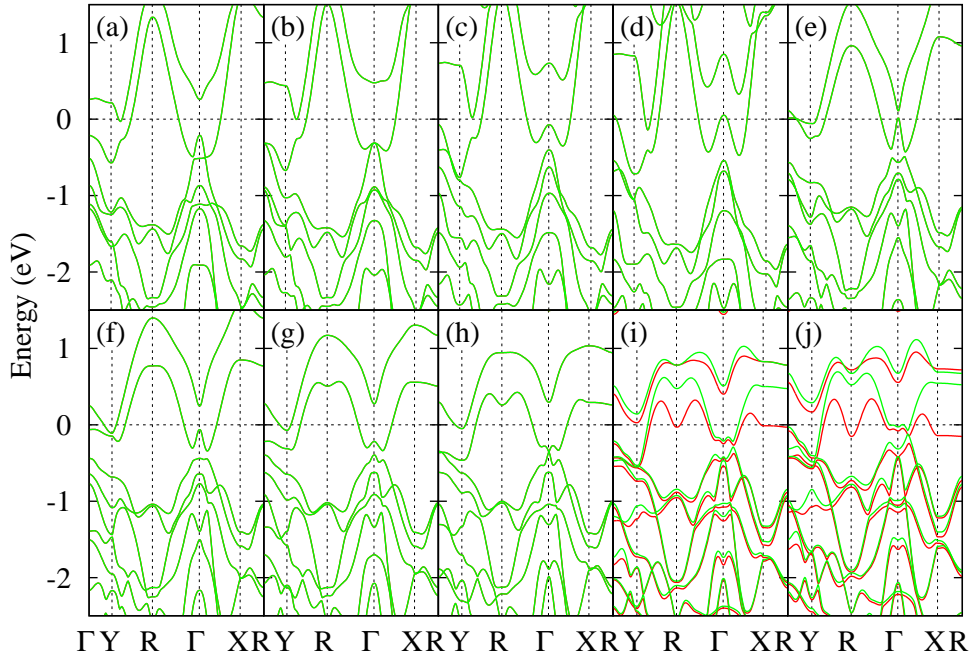

FIG. S7: (Color online). Calculated band structures of  $1T_d\text{-Re}_{0.5}\text{Mo}_{0.5}\text{S}_2$  monolayers as a function of lattice constant  $\vec{a}$  ((a) 3.078 Å, (b) 3.014 Å, (c) 2.950 Å, (d) 2.886 Å, (e) 3.206 Å, (f) 3.270 Å, (g) 3.335 Å, (h) 3.399 Å, (i) 3.463 Å, (j) 3.527 Å) with a fixed  $\vec{b}=5.720$  Å. The fermi level is set to zero. Red: Spin-up bands; Green: Spin-down bands.

For  $1T_d\text{-Re}_{0.5}\text{Mo}_{0.5}\text{S}_2$  monolayers, their band structures as a function of lattice constants  $\vec{a}$  with a fixed  $\vec{b} = 5.720$  Å are shown in Fig. S7. All conduction bands cross down the Fermi level, showing n-type character. Furthermore, the spin-down and spin-up bands are symmetric until a uniaxial tensile strain along the  $\vec{a}$  direction reaches to  $\sim 9.18\%$  ( $\vec{a} = 3.463$  Å). On the contrary, a uniaxial compressive strain along the  $\vec{b}$  direction seem to have no effect.



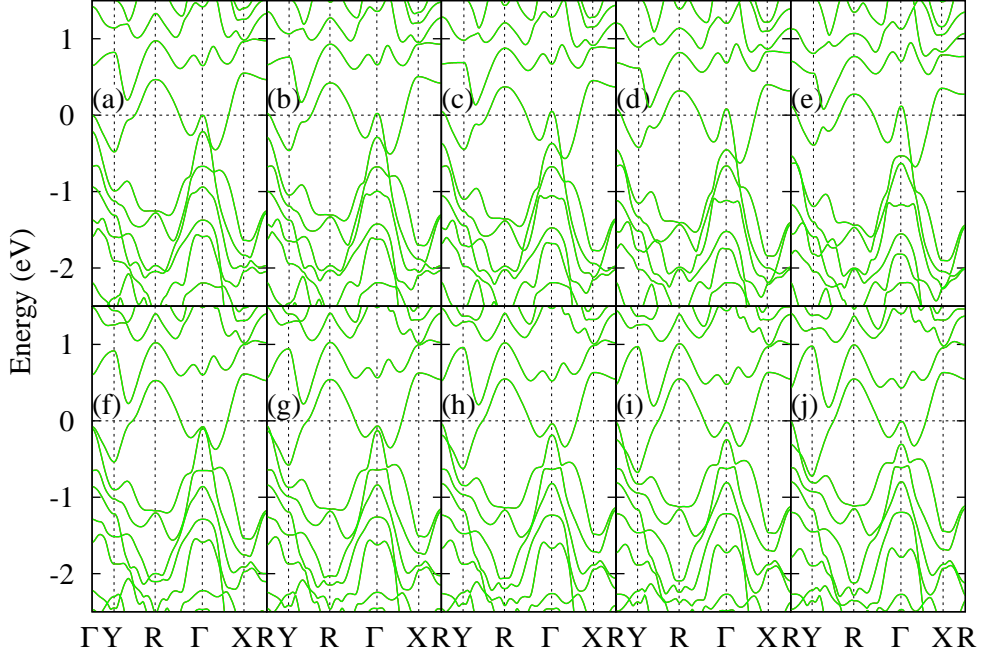

FIG. S8: (Color online). Calculated band structures of  $1T_d\text{-Re}_{0.5}\text{Mo}_{0.5}\text{Te}_2$  monolayers as a function of lattice constant  $\vec{b}$  ((a) 6.296 Å, (b) 6.235 Å, (c) 6.174 Å, (d) 6.113 Å, (e) 6.052 Å, (f) 6.418 Å, (g) 6.480 Å, (h) 6.541 Å, (i) 6.602 Å, (j) 6.663 Å) with a fixed  $\vec{a}=3.459$  Å. The fermi level is set to zero. Red: Spin-up bands; Green: Spin-down bands.

For  $1T_d\text{-Re}_{0.5}\text{Mo}_{0.5}\text{Te}_2$  monolayers, their band structures as a function of lattice constant  $\vec{b}$  with a fixed  $\vec{a} = 3.459$  Å are shown in Fig. S8. All the spin-down and spin-up bands are always symmetric, when a uniaxial compressive strain along the  $\vec{b}$  direction is applied.

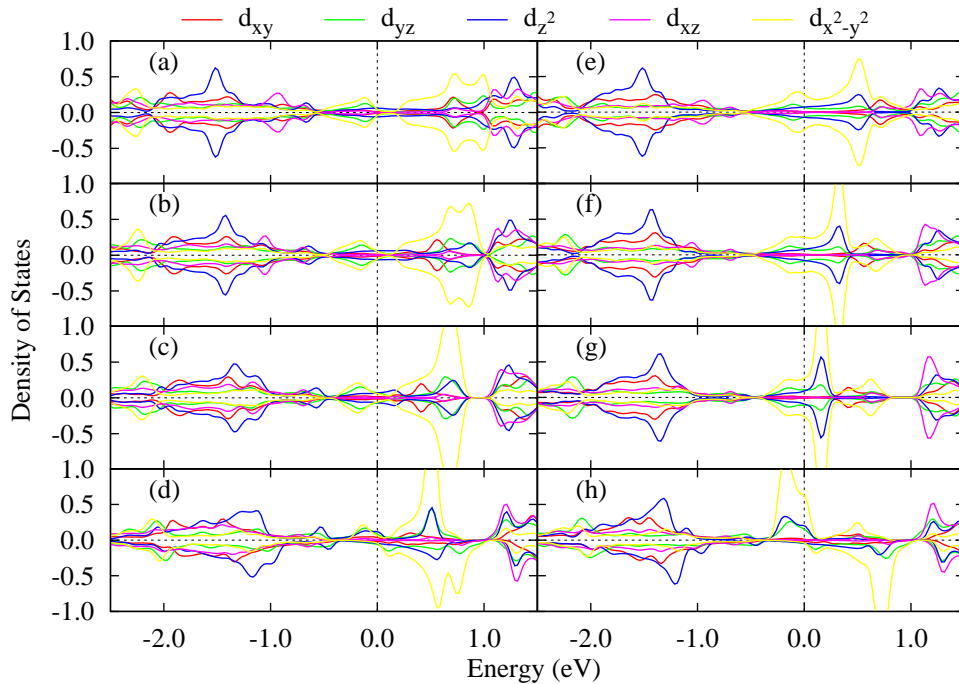

FIG. S9: (Color online). Calculated spin-polarized atomic projected density of states ((a-d) Mo and (e-h) Re) as a function of lattice constant  $\vec{a}$  ((a,e)  $\vec{a}=3.459$  Å, (b,f)  $\vec{a}=3.529$  Å, (c,g)  $\vec{a}=3.600$  Å, (d,h)  $\vec{b}=3.670$  Å) for  $1T_d$ - $\text{Re}_{0.5}\text{Mo}_{0.5}\text{Te}_2$  with a fixed  $\vec{b} = 6.357$  Å. Positive and negative values represent the spin-up and spin-down bands, respectively. The Fermi level is taken as zero.

For  $1T_d$ - $\text{Re}_{0.5}\text{Mo}_{0.5}\text{Te}_2$ , the conduction bands of Re atoms move to the Fermi level and become narrower and narrower when a uniaxial tensile strain is applied along the  $\vec{a}$  direction. Finally, the conduction bands around the Fermi level are mainly contributed by Re's  $d_{x^2-y^2}$ ,  $d_{z^2}$  and  $d_{yz}$ . Therefore, at a certain tensile strain, the magnetic moments are mainly attributed to these three orbitals.

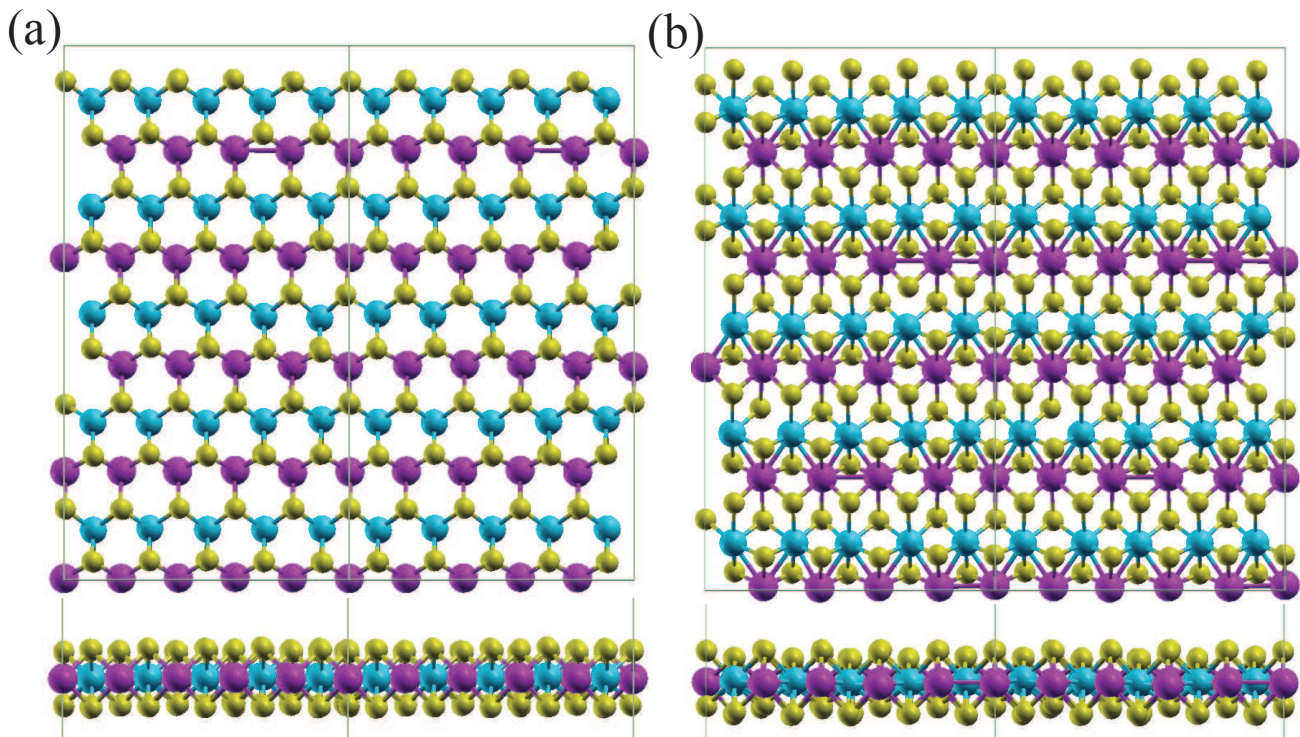

FIG. S10: (Color online). Top and side views of fully-optimized (a)  $1H$ - and (b)  $1T_d$ - $\text{Re}_{0.5}\text{Mo}_{0.5}\text{S}_2$  monolayers with  $\vec{a} = 3.142$  Å and  $\vec{b} = 5.887$  Å. Mo atoms, Pink; S atoms, yellow; Re atoms, blue.

Taking monolayer  $1H$ - and  $1T_d$ - $\text{Re}_{0.5}\text{Mo}_{0.5}\text{S}_2$  with  $\vec{a} = 3.142$  Å and  $\vec{b} = 5.887$  Å as examples, we do first-principles molecular dynamics simulations at 300 K. It is find that within up to 1 ps (the step size 1 fs) Re-doped  $\text{Mo}_{0.5}\text{S}_2$  are thermodynamically stable. The corresponding structures are shown in Figs. S10 (a,b).

---

\* Electronic address: [rnwang@hbu.edu.cn](mailto:rnwang@hbu.edu.cn)

† Electronic address: [jlwang@hbu.edu.cn](mailto:jlwang@hbu.edu.cn)
